# Supplementary material
Source: publisher figshare collection journal article supplement (https://acs.figshare.com/ndownloader/files/4272744)
Supplement: Supplementary file 1 [file 4272744]

# Supporting Information

## A Novel and Highly Stereoselective Synthesis of 2-Substituted Perhydrofuro[2,3-*b*]pyran Derivatives

Xiaofeng Ma<sup>†</sup>, Qiang Tian<sup>†</sup>, Qin Tang<sup>†</sup>, Jinzhong Zhao<sup>†,‡</sup>, Huawu Shao<sup>\*†</sup>

*Natural Products Research Center, Chengdu Institute of Biology, Chinese Academy of Sciences, Chengdu 610041, China, Shanxi Agriculture University, Taigu Shanxi 030801, China and Graduate School of Chinese Academy of Sciences, China*

\*Correspondence author: E-mail: shaohw@cib.ac.cn

Fax: (+86) 28-85222753

## Contents

|                                           |          |
|-------------------------------------------|----------|
| 1. General                                | S-3      |
| 2. Synthetic Procedures and Spectral Data | S-3~S-15 |

## 1. General

All reactions sensitive to air or moisture were carried out under nitrogen or argon atmosphere with anhydrous solvents. All reagents were purchased from commercial suppliers and used without further purification unless otherwise noted. Thin-layer chromatography was performed using silica gel GF254 precoated plates (0.20–0.25 mm thickness) with a fluorescent indicator. Visualization on TLC was achieved by UV light (254 nm) and a typical TLC indication solution (10% sulfuric acid / ethanol solution). Column chromatography was performed on silica gel 90, 200–300 mesh. Optical rotations were measured with a Perkin Elmer M341 Digital Polarimeter.  $^1\text{H}$  and  $^{13}\text{C}$  NMR (600 and 150 MHz, respectively) spectra were recorded on a Bruker Avance 600 spectrometer.  $^1\text{H}$  NMR chemical shifts are reported in ppm ( $\delta$ ) relative to tetramethylsilane (TMS) with the solvent resonance employed as the internal standard ( $\text{CDCl}_3$ ,  $\delta$  7.26 ppm;  $\text{CD}_3\text{COCD}_3$ ,  $\delta$  2.05 ppm). Data are reported as follows: chemical shift, multiplicity (s = singlet, d = doublet, t = triplet, q = quartet, m = multiplet), coupling constants (Hz) and integration.  $^{13}\text{C}$  NMR chemical shifts are reported in ppm from tetramethylsilane (TMS) with the solvent resonance as the internal standard ( $\text{CDCl}_3$ ,  $\delta$  77.0 ppm;  $\text{CD}_3\text{COCD}_3$ ,  $\delta$  39.5). ESI-HRMS spectra were recorded on BioTOFQ.

## 2. Synthetic Procedures and Spectral Data

### Generally procedures for the synthesis of glycosyl donors

To a solution of aldehyde (2 g, 3.2 mmol) and nucleophile (2–3 equiv) (EtSH, PhSH, 4-MePhSH) in MeOH or DMF (15–20 mL) was added  $\text{K}_2\text{CO}_3$  (10 equiv). The suspension was stirred at room temperature 2–5 h. The reaction mixture was concentrated. Purification was then performed on a silica gel column.

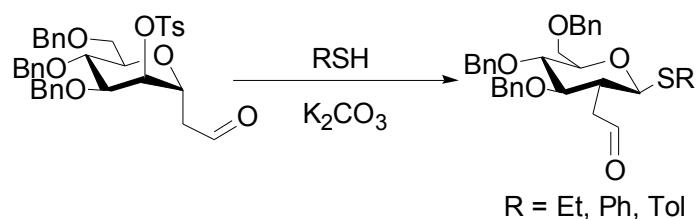

### 2.1 *p*-Tolyl 3, 4, 6-tri-*O*-benzyl-2-*C*-formylmethyl-2-deoxy- $\beta$ -D-thiogluco pyranoside (**1**)

To a solution of aldehyde 2.0 g and 4-MePhSH 0.79 g in DMF 15 mL was added  $\text{K}_2\text{CO}_3$  (4.37 g). The suspension was stirred at room temperature for 4 h. The reaction mixture was concentrated. Purification was then performed on a silica gel column (petroleum ether/ethyl acetate, 10:1) to afford major product **1** (1.29 g, 70%) as white powder.

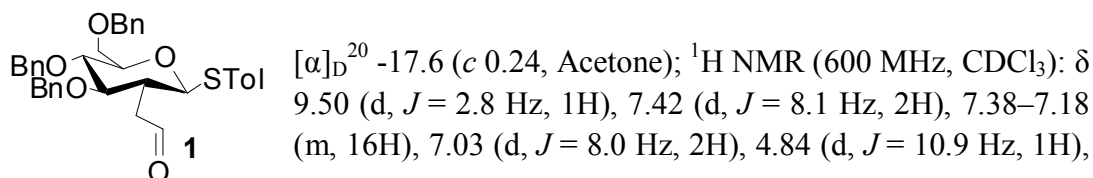

4.77 (d,  $J = 11.0$  Hz, 1H), 4.64 (d,  $J = 5.5$  Hz, 1H), 4.62 (d,  $J = 4.6$  Hz, 1H), 4.58 (d,  $J = 10.6$  Hz, 1H), 4.56 (d,  $J = 11.9$  Hz, 1H), 4.51 (d,  $J = 10.9$  Hz, 1H), 3.81–3.75 (m, 2H), 3.64 (t,  $J = 9.3$  Hz, 1H), 3.52–3.45 (m, 2H), 2.84 (dd,  $J = 16.9, 3.7$  Hz, 1H), 2.44 (ddd,  $J = 17.0, 7.5, 3.2$  Hz, 1H), 2.29–2.23 (m, 1H);  $^{13}\text{C}$  NMR(150 MHz,  $\text{CDCl}_3$ ):  $\delta$  200.1, 138.4, 138.2, 138.0, 137.7, 133.2, 129.8, 128.5, 128.4, 128.2, 127.9, 127.8, 127.7, 127.7, 127.6, 86.9, 83.8, 79.6, 79.4, 77.3, 77.1, 76.9, 74.8, 73.5, 69.0, 44.1, 42.7, 21.1; ESI-HRMS:  $m/z$  calcd for  $\text{C}_{36}\text{H}_{38}\text{NaO}_5\text{S}$   $[\text{M}+\text{Na}]^+$ : 605.2338; found: 605.2318.

## 2.2 Phenyl 3, 4, 6-tri-*O*-benzyl-2-*C*-formylmethyl-2-deoxy- $\beta$ -D-thioglucopyranoside (**2**).

To a solution of aldehyde **2.0** g and PhSH 0.70 g in MeOH 20 mL was added  $\text{K}_2\text{CO}_3$  (4.37 g). The suspension was stirred at room temperature 5 h. The reaction mixture concentrated. Purification was then performed on a silica gel column (petroleum ether/ethyl acetate, 10:1) to afford the product **2** (1.44 g, 80%) as white powder.

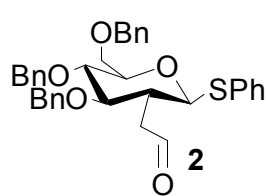

$[\alpha]_{\text{D}}^{20} +22.4$  ( $c$  0.21,  $\text{CHCl}_3$ );  $^1\text{H}$  NMR (600 MHz,  $\text{CDCl}_3$ ):  $\delta$  9.50 (d,  $J = 2.7$  Hz, 1H), 7.52 (dd,  $J = 7.8, 1.1$  Hz, 2H), 7.36–7.31(m, 4H), 7.30–7.20 (m, 14H), 4.85 (d,  $J = 10.9$  Hz, 1H), 4.78 (d,  $J = 10.9$  Hz, 1H), 4.67–4.62 (m, 3H), 4.56 (d,  $J = 11.9$  Hz, 1H), 4.52 (d,  $J = 10.9$  Hz, 1H), 3.81–3.76 (m, 2H), 3.66 (t,  $J = 9.2$  Hz, 1H), 3.54–3.49 (m, 2H), 2.83 (dd,  $J = 16.9, 3.8$  Hz, 1H), 2.44 (ddd,  $J = 17.1, 7.4, 3.1$  Hz, 1H), 2.33–2.31 (m, 1H).

## 2.3 Ethyl 3, 4, 6-tri-*O*-benzyl-2-*C*-formylmethyl-2-deoxy- $\beta$ -D-thioglucopyranoside (**3**).

To a solution of aldehyde **2.0** g and EtSH 0.71 mL in DMF 15 mL was added  $\text{K}_2\text{CO}_3$  (4.37 g). The suspension was stirred at room temperature 3 h. The reaction mixture concentrated. Purification was then performed on a silica gel column (petroleum ether/ethyl acetate, 8:1) to afford major product **3** (1.25 g, 76%) as colorless syrup.

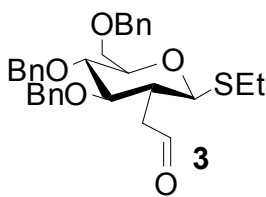

$[\alpha]_{\text{D}}^{20} +12.0$  ( $c$  0.24,  $\text{CHCl}_3$ );  $^1\text{H}$  NMR (600 MHz,  $\text{CDCl}_3$ ):  $\delta$  9.56 (d,  $J = 1.7$  Hz, 1H), 7.348–7.18 (m, 15H), 4.86 (d,  $J = 11.0$  Hz, 1H), 4.77 (d,  $J = 11.0$  Hz, 1H), 4.61(dd,  $J = 12.5, 3.8$ Hz, 2H), 4.53 (dd,  $J = 11.0, 3.0$  Hz, 2H), 4.43 (d,  $J = 10.7$  Hz, 1H), 3.74 (d,  $J = 3.9$  Hz, 2H), 3.65 (t,  $J = 9.2$  Hz, 1H), 3.49–3.45 (m, 2H), 2.74–2.61 (m, 3H), 2.44–2.40 (m, 1H), 2.36–2.30 (m, 1H), 1.26 (t,  $J = 7.6$  Hz, 3H);  $^{13}\text{C}$  NMR (150 MHz,  $\text{CDCl}_3$ ):  $\delta$  200.0, 138.2, 138.0, 137.8, 128.0, 127.8, 127.8, 127.8, 127.6, 84.5, 83.8, 79.8, 79.4, 74.7, 74.7, 73.5, 69.1, 43.7, 43.3, 24.5, 15.0; ESI-HRMS:  $m/z$  calcd for  $\text{C}_{31}\text{H}_{36}\text{NaO}_5\text{S}$   $[\text{M}+\text{Na}]^+$ : 543.2181; found: 543.2178.

## 2.4 Experimental Procedures and Spectral Data

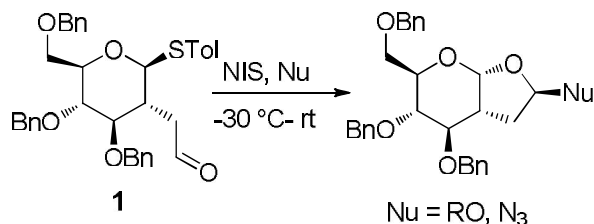

### (2*R*, 3*aR*, 4*R*, 5*S*, 6*R*, 7*aR*)-4, 5-bis(benzyloxy)-6-[(benzyloxy)methyl]-2-methoxyhexahydro-furo[2,3-*b*]pyran (**5**)

A suspension of glycosyl donor **1** (58.2 mg), and MeOH **4** (8.1  $\mu$ L), containing activated 4 Å molecular sieves (50 mg) in dry CH<sub>2</sub>Cl<sub>2</sub> (2.0 mL) was stirred under argon at room temperature for 30 minutes. After cooling to –30 °C, NIS (33 mg) was added. The reaction mixture was then warmed slowly to room temperature, stirred for 2 h, and then quenched by the addition of NaS<sub>2</sub>O<sub>3</sub>. The suspension was diluted with CH<sub>2</sub>Cl<sub>2</sub> (5.0 mL), and filtered through Celite. The filtrate was washed successively with H<sub>2</sub>O, saturated NaCl solution and dried with Na<sub>2</sub>SO<sub>4</sub>. The crude product was purified by flash column chromatography (petroleum ether/ethyl acetate, 5:1→4:1) to afford major product **5** (37.7 mg, 77%) and **6** (7.3 mg, 15%).

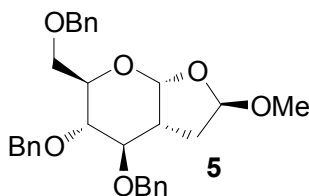

$[\alpha]_D^{20} + 11.4$  (*c* 0.39, Acetone); <sup>1</sup>H NMR (600 MHz, Acetone-*d*<sub>6</sub>):  $\delta$  7.42–7.25 (15H, m), 5.46 (1H, d, *J* = 5.5 Hz), 5.08 (1H, dd, *J* = 5.5 Hz, 2.9 Hz), 4.79 (1H, d, *J* = 11.2 Hz), 4.73 (1H, d, *J* = 11.3 Hz), 4.69 (1H, d, *J* = 11.8 Hz), 4.60–4.52 (3H, m), 3.79–3.76 (1H, m), 3.73 (1H, dd, *J* = 10.98 Hz, 4.7 Hz), 3.68–3.62 (3H, m), 3.29 (3H, m), 2.53–2.51 (1H, m), 2.23–2.19 (1H, m), 1.88–1.84 (1H, m); <sup>13</sup>C NMR (150 MHz, *d*<sub>6</sub>-Acetone):  $\delta$  139.0, 138.8, 138.6, 128.2(2), 127.8(2), 127.6, 127.5(2), 127.4, 127.3, 103.1, 100.3, 79.2, 77.3, 72.9(2), 72.7, 71.5, 69.8, 54.3, 41.0, 34.4; ESI-HRMS: *m/z* calcd for C<sub>30</sub>H<sub>34</sub>NaO<sub>6</sub> [M+Na]<sup>+</sup>: 513.2253; found: 513.2252.

### (2*S*, 3*aR*, 4*R*, 5*S*, 6*R*, 7*aR*)-4,5-bis(benzyloxy)-6-[(benzyloxy)methyl]-2-methoxyhexahydro-furo[2,3-*b*]pyran (**6**)

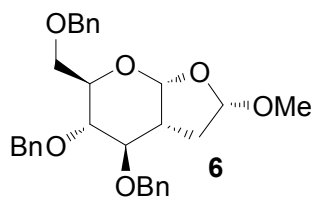

Colorless syrup;  $[\alpha]_D^{20} + 32.1$  ( $c$  0.08, Acetone);  $^1\text{H}$  NMR (600 MHz, Acetone- $d_6$ ):  $\delta$  7.40–7.24 (m, 15H), 5.49 (d,  $J$  = 5.4 Hz, 1H), 4.92 (dd,  $J$  = 5.0 Hz, 0.7 Hz 1H), 4.82 (d,  $J$  = 11.6 Hz, 1H), 4.78 (d,  $J$  = 11.1 Hz, 1H), 4.70 (d,  $J$  = 11.6 Hz, 1H), 4.68 (d,  $J$  = 11.1 Hz, 1H), 4.61 (d,  $J$  = 12.0 Hz, 1H), 4.57 (d,  $J$  = 12.0 Hz, 1H), 4.05 (t,  $J$  = 7.9 Hz, 1H), 3.87–3.80 (m, 2H), 3.73 (d,  $J$  = 9.0 Hz, 1H), 3.61–3.56 (m, 1H), 3.31 (s, 3H), 2.29 (ddd,  $J$  = 7.7, 5.8, 1.9 Hz, 1H), 2.28–2.25 (m, 1H), 2.24–2.17 (m, 1H);  $^{13}\text{C}$  NMR (150 MHz,  $d_6$ -Acetone):  $\delta$  139.3, 138.9, 138.8, 128.2, 128.1, 127.8, 127.6 (2), 127.4, 127.3 (2), 103.6, 102.9, 82.0, 78.1, 73.8, 73.5, 72.9, 71.6, 69.3, 54.4, 41.7, 35.5; ESI-HRMS:  $m/z$  calcd for  $\text{C}_{30}\text{H}_{34}\text{NaO}_6$   $[\text{M}+\text{Na}]^+$ : 513.2253; found: 513.2250.

**(2*R*, 3*aR*, 4*R*, 5*S*, 6*R*, 7*aR*)-4,5-bis(benzyloxy)-6-((benzyloxy)methyl)-2-ethoxyhexahydro-furo[2,3-*b*]pyran (8)**

A suspension of glycosyl donor **1** (58.2 mg), and EtOH **7** (17.5  $\mu\text{L}$ ), containing activated 4 Å molecular sieves (50 mg) in dry  $\text{CH}_2\text{Cl}_2$  (2.0 mL) was stirred under argon at room temperature for 30 minutes. After cooling to  $-30^\circ\text{C}$ , NIS (33 mg) was added. The reaction mixture was then warmed slowly to room temperature, stirred for 2 h, and then quenched by the addition of  $\text{NaS}_2\text{O}_3$ . The suspension was diluted with  $\text{CH}_2\text{Cl}_2$  (5.0 mL), and filtered through Celite. The filtrate was washed successively with  $\text{H}_2\text{O}$ , saturated NaCl solution and dried with  $\text{Na}_2\text{SO}_4$ . The crude product was purified by flash column chromatography (petroleum ether/ethyl acetate, 5:1→4:1) to afford major product **8** (41.9 mg, 83%).

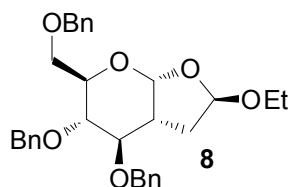

Colorless syrup;  $[\alpha]_D^{20} + 16.1$  ( $c$  0.32, Acetone);  $^1\text{H}$  NMR (600MHz, Acetone- $d_6$ ):  $\delta$  7.40–7.25 (15H, m), 5.46 (1H, d,  $J$  = 5.5 Hz), 5.04 (1H, d,  $J$  = 4.7 Hz), 4.83–4.78 (2H, m), 4.72–4.67 (2H, m), 4.62–4.55 (2H, m), 4.11 (1H, t,  $J$  = 7.7 Hz), 3.90–3.87 (1H, m), 3.83–3.79 (1H, m), 3.74–3.71 (2H, m), 3.60 (1H, dd,  $J$  = 9.54 Hz, 8.0 Hz), 3.41–3.39 (1H, m), 2.29–2.27 (1H, m), 2.25–2.20 (1H, m), 2.02–1.99 (1H, m), 1.16 (3H, t,  $J$  = 7.0 Hz);  $^{13}\text{C}$  NMR (150 MHz, Acetone):  $\delta$  139.3, 138.9(2), 128.2, 128.1, 127.8, 127.7, 127.6(2), 127.4, 127.3(2), 102.7, 102.3, 81.7, 78.2, 73.7, 73.4, 72.9, 71.7, 69.4, 62.9, 41.7, 35.5, 14.8; ESI-HRMS:  $m/z$  calcd for  $\text{C}_{31}\text{H}_{36}\text{NaO}_6$   $[\text{M}+\text{Na}]^+$ : 527.2410; found: 527.2399.

**(2*R*, 3*aR*, 4*R*, 5*S*, 6*R*, 7*aR*)-4,5-bis(benzyloxy)-6-((benzyloxy)methyl)-2-isopropoxyhexahydro-furo[2,3-*b*]pyran (10)**

A suspension of glycosyl donor **1** (58.2 mg), and *i*-PrOH **9** (23.0  $\mu\text{L}$ ), containing activated 4 Å molecular sieves (50 mg) in dry  $\text{CH}_2\text{Cl}_2$  (2.0 mL) was stirred under argon at room temperature for 30 minutes. After cooling to  $-30^\circ\text{C}$ , NIS (33 mg) was added. The reaction mixture was then warmed slowly to room temperature, stirred for 2 h, and then quenched by the addition of  $\text{NaS}_2\text{O}_3$ . The suspension was diluted with

CH<sub>2</sub>Cl<sub>2</sub> (5.0 mL), and filtered through Celite. The filtrate was washed successively with H<sub>2</sub>O, saturated NaCl solution and dried with Na<sub>2</sub>SO<sub>4</sub>. The crude product was purified by flash column chromatography (petroleum ether/ethyl acetate, 5:1→4:1) to afford major product **10** (31.6 mg, 87%).

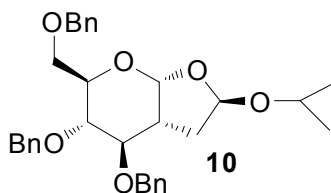

Colorless syrup;  $[\alpha]_D^{20} + 33.1$  (*c* 0.14, Acetone); <sup>1</sup>H NMR (600 MHz, Acetone-*d*<sub>6</sub>): δ 7.63–7.07 (m, 15H), 5.43 (d, *J* = 5.3 Hz, 1H), 5.20–5.16 (m, 1H), 4.82 (d, *J* = 11.6 Hz, 1H), 4.79 (d, *J* = 11.2 Hz, 1H), 4.71 (d, *J* = 11.6 Hz, 1H), 4.67 (d, *J* = 11.1 Hz, 1H), 4.61 (d, *J* = 12.0 Hz, 1H), 4.56 (d, *J* = 12.0 Hz, 1H), 4.14 (t, *J* = 7.7 Hz, 1H), 3.94 (ddd, *J* = 9.6, 4.0, 1.7 Hz, 1H), 3.86 (dt, *J* = 12.3, 6.1 Hz, 1H), 3.81 (dd, *J* = 10.8, 4.3 Hz, 1H), 3.72 (dd, *J* = 10.8, 2.0 Hz, 1H), 3.59 (dd, *J* = 9.6, 8.0 Hz, 1H), 2.28–2.25 (m, 1H), 2.22 (dd, *J* = 13.5, 7.7 Hz, 1H), 1.96 (d, *J* = 13.2 Hz, 1H), 1.18 (d, *J* = 6.2 Hz, 3H), 1.10 (d, *J* = 6.1 Hz, 3H). <sup>13</sup>C NMR (150 MHz, Acetone): δ 139.3, 138.9 (2), 128.2, 128.1, 127.8, 127.7, 127.6, 127.4, 127.3, 102.6, 100.6, 81.4, 78.2, 73.8, 73.4, 72.9, 71.8, 69.4, 69.3, 41.8, 35.5, 23.2, 21.0; ESI-HRMS: *m/z* calcd for C<sub>32</sub>H<sub>38</sub>NaO<sub>6</sub> [M+Na]<sup>+</sup>: 541.2566; found: 541.2552.

**(2*R*, 3*aR*, 4*R*, 5*S*, 6*R*, 7*aR*)-4,5-bis(benzyloxy)-6-[(benzyloxy)methyl]-2-(tert-butoxy)hexahydro-furo[2,3-*b*]pyran (**12**)**

A suspension of glycosyl donor **1** (58.2 mg), and *t*-BuOH **11** (28.7 μL), containing activated 4 Å molecular sieves (50 mg) in dry CH<sub>2</sub>Cl<sub>2</sub> (2.0 mL) was stirred under argon at room temperature for 30 minutes. After cooling to –30 °C, NIS (33 mg) was added. The reaction mixture was then warmed slowly to room temperature, stirred for 2 h, and then quenched by the addition of NaS<sub>2</sub>O<sub>3</sub>. The suspension was diluted with CH<sub>2</sub>Cl<sub>2</sub> (5.0 mL), and filtered through Celite. The filtrate was washed successively with H<sub>2</sub>O, saturated NaCl solution and dried with Na<sub>2</sub>SO<sub>4</sub>. The crude product was purified by flash column chromatography (petroleum ether/ethyl acetate, 5:1→4:1) to afford major product **12** (26.2 mg, 82%).

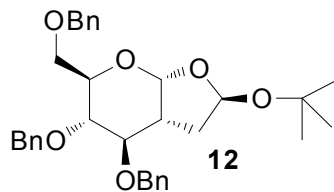

Colorless syrup;  $[\alpha]_D^{20} + 59.0$  (*c* 0.23, Acetone); <sup>1</sup>H NMR (600 MHz, Acetone-*d*<sub>6</sub>): δ 8.03–6.77 (m, 15H), 5.37 (d, *J* = 4.8 Hz, 1H), 5.35 (d, *J* = 5.5 Hz, 1H), 4.85–4.81 (m, 1H), 4.79 (d, *J* = 11.1 Hz, 1H), 4.73–4.70 (m, 1H), 4.70–4.67 (m, 1H), 4.62–4.55 (m, 2H), 4.18 (t, *J* = 7.7 Hz, 1H), 3.99 (ddd, *J* = 9.6, 4.3, 1.9 Hz, 1H), 3.82 (dd, *J* = 10.8,

4.3 Hz, 1H), 3.72 (dd,  $J = 10.9, 1.9$  Hz, 1H), 3.59 (dd,  $J = 9.6, 8.2$  Hz, 1H), 2.25–2.17 (m, 2H), 1.93–1.86 (m, 1H), 1.22 (s, 9H).  $^{13}\text{C}$  NMR (150 MHz, Acetone):  $\delta$  139.4, 139.0, 128.9, 128.2, 128.1, 127.8, 127.7, 127.6 (2), 127.4 (2), 127.3, 102.4, 96.9, 81.3, 78.4, 73.9, 73.7, 73.5, 72.9, 71.7, 69.4, 42.0, 36.2, 29.5, 28.3, 28.0; ESI-HRMS:  $m/z$  calcd for  $\text{C}_{33}\text{H}_{40}\text{NaO}_6$   $[\text{M}+\text{Na}]^+$ : 555.2723; found: 555.2714.

**(2*R*, 3*aR*, 4*R*, 5*S*, 6*R*, 7*aR*)-2-(adamantanyloxy)-4,5-bis(benzyloxy)-6-[(benzyloxy)methyl]hexahydro-furo[2,3-*b*]pyran (14)**

A suspension of glycosyl donor **1** (58.2 mg), and adamantanol **13** (18.3 mg), containing activated 4 Å molecular sieves (50 mg) in dry  $\text{CH}_2\text{Cl}_2$  (2.0 mL) was stirred under argon at room temperature for 30 minutes. After cooling to  $-30\text{ }^\circ\text{C}$ , NIS (33 mg) was added. The reaction mixture was then warmed slowly to room temperature, stirred for 3 h, and then quenched by the addition of  $\text{NaS}_2\text{O}_3$ . The suspension was diluted with  $\text{CH}_2\text{Cl}_2$  (5.0 mL), and filtered through Celite. The filtrate was washed successively with  $\text{H}_2\text{O}$ , saturated NaCl solution and dried with  $\text{Na}_2\text{SO}_4$ . The crude product was purified by flash column chromatography. (petroleum ether/ethyl acetate, 5:1→4:1) to afford major product **14** (47.6 mg, 78%).

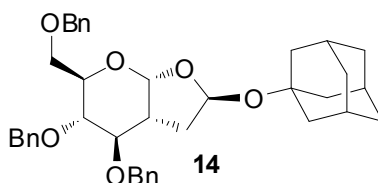

Colorless syrup;  $[\alpha]_{\text{D}}^{20} + 17.5$  ( $c$  0.23, Acetone);  $^1\text{H}$  NMR (600 MHz, Acetone- $d_6$ ):  $\delta$  7.39–7.23 (m, 15H), 5.63 (dd,  $J = 5.5, 3.8$  Hz, 1H), 5.45 (d,  $J = 5.1$  Hz, 1H), 4.80 (d,  $J = 11.7$  Hz, 1H), 4.74 (d,  $J = 11.2$  Hz, 1H), 4.70 (d,  $J = 11.7$  Hz, 1H), 4.61 (d,  $J = 11.3$  Hz, 1H), 4.58 (d,  $J = 12.0$  Hz, 1H), 4.53 (d,  $J = 12.0$  Hz, 1H), 3.74 (dd,  $J = 10.6, 4.5$  Hz, 2H), 3.66 (dd,  $J = 10.3, 1.6$  Hz, 1H), 3.61 (dt,  $J = 13.0, 6.3$  Hz, 2H), 2.44 (dd,  $J = 12.2, 6.2$  Hz, 1H), 2.17–2.06 (m, 5H), 1.78 (dt,  $J = 14.9, 11.6$  Hz, 6H), 1.62 (q,  $J = 12.3$  Hz, 6H).  $^{13}\text{C}$  NMR (150 MHz, Acetone):  $\delta$  139.1, 138.8, 138.7, 128.2, 128.2, 127.9, 127.8, 127.4, 127.3, 100.1, 95.3, 79.6, 77.6, 73.1, 73.0, 72.9, 71.6, 69.7, 42.7, 41.8, 36.2, 35.8, 30.6, 29.5; ESI-HRMS:  $m/z$  calcd for  $\text{C}_{39}\text{H}_{46}\text{NaO}_6$   $[\text{M}+\text{Na}]^+$ : 633.3192; found: 633.3185.

**(2*R*, 3*aR*, 4*R*, 5*S*, 6*R*, 7*aR*)-4,5-bis(benzyloxy)-6-[(benzyloxy)methyl]-2-(furan-2-ylmethoxy)hexahydro-furo[2,3-*b*]pyran (16)**

A suspension of glycosyl donor **1** (58.2 mg), and 2-Furanmethanol **15** (10.4  $\mu\text{L}$ ), containing activated 4 Å molecular sieves (50 mg) in dry  $\text{CH}_2\text{Cl}_2$  (2.0 mL) was stirred under argon at room temperature for 30 minutes. After cooling to  $-30\text{ }^\circ\text{C}$ , NIS (33 mg) was added. The reaction mixture was then warmed slowly to room temperature, stirred for 3 h, and then quenched by the addition of  $\text{NaS}_2\text{O}_3$ . The suspension was diluted with  $\text{CH}_2\text{Cl}_2$  (5.0 mL), and filtered through Celite. The filtrate was washed successively with  $\text{H}_2\text{O}$ , saturated NaCl solution and dried with  $\text{Na}_2\text{SO}_4$ . The crude product was purified by flash column chromatography (petroleum ether/ethyl acetate,



5:1) to afford major product **16** (39.5 mg, 71%).

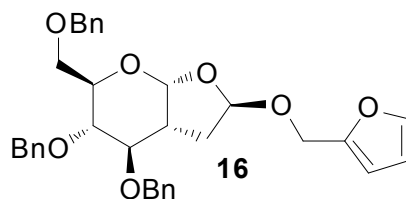

$[\alpha]_D^{20}$  -11.6 (*c* 0.24, Acetone);  $^1\text{H}$  NMR (600 MHz, Acetone- $d_6$ ):  $\delta$  7.51 (dd,  $J$  = 1.6, 0.8 Hz, 1H), 7.39–7.25 (m, 15H), 6.38 (dt,  $J$  = 6.9, 2.5 Hz, 2H), 5.52 (d,  $J$  = 5.4 Hz, 1H), 5.30 (dd,  $J$  = 5.6, 2.7 Hz, 1H), 4.78 (d,  $J$  = 11.8 Hz, 1H), 4.72 (d,  $J$  = 11.3 Hz, 1H), 4.69 (d,  $J$  = 11.8 Hz, 1H), 4.61–4.53 (m, 4H), 4.46 (d,  $J$  = 12.8 Hz, 1H), 3.81–3.77 (m, 1H), 3.73 (dd,  $J$  = 10.8, 4.7 Hz, 1H), 3.68 (dd,  $J$  = 10.9, 2.2 Hz, 1H), 3.66–3.64 (m, 2H), 2.57 (d,  $J$  = 5.8 Hz, 1H), 2.22 (dt,  $J$  = 13.6, 5.9 Hz, 1H), 1.89 (ddd,  $J$  = 13.6, 8.0, 2.7 Hz, 1H).  $^{13}\text{C}$  NMR (150 MHz, Acetone):  $\delta$  151.9, 142.8, 139.0, 138.8, 138.6, 128.2, 128.1, 128.0, 127.9(2), 127.6, 127.5, 127.4, 127.3, 110.2, 110.1, 100.9, 100.5, 79.5, 77.2, 72.9, 72.8, 72.6, 71.5, 69.8, 60.7, 40.8, 34.4; ESI-HRMS:  $m/z$  calcd for  $\text{C}_{34}\text{H}_{36}\text{NaO}_7$   $[\text{M}+\text{Na}]^+$ : 579.2359; found: 579.2362.

**(2*R*, 3*aR*, 4*R*, 5*S*, 6*R*, 7*aR*)-2,4,5-tris(benzyloxy)-6-[(benzyloxy)methyl]hexahydro-furo[2,3-*b*]pyran (**18**)**

A suspension of glycosyl donor **1** (58.2 mg), and BnOH **17** (12.5  $\mu\text{L}$ ), containing activated 4 Å molecular sieves (50 mg) in dry  $\text{CH}_2\text{Cl}_2$  (2.0 mL) was stirred under argon at room temperature for 30 minutes. After cooling to  $-30\text{ }^\circ\text{C}$ , NIS (33 mg) was added. The reaction mixture was then warmed slowly to room temperature, stirred for 2.5 h, and then quenched by the addition of  $\text{NaS}_2\text{O}_3$ . The suspension was diluted with  $\text{CH}_2\text{Cl}_2$  (5.0 mL), and filtered through Celite. The filtrate was washed successively with  $\text{H}_2\text{O}$ , saturated NaCl solution and dried with  $\text{Na}_2\text{SO}_4$ . The crude product was purified by flash column chromatography (petroleum ether/ethyl acetate, 5:1→4:1) to afford major product **18** (39.1 mg, 69%).

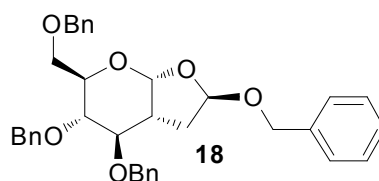

$[\alpha]_D^{20}$  + 1.1 (*c* 0.27, Acetone);  $^1\text{H}$  NMR (600 MHz, Acetone- $d_6$ ):  $\delta$  7.42–7.22 (m, 20H), 5.54 (d,  $J$  = 5.4 Hz, 1H), 5.32 (dd,  $J$  = 5.6, 2.7 Hz, 1H), 4.78 (d,  $J$  = 11.8 Hz, 1H), 4.73 (d,  $J$  = 12.1 Hz, 2H), 4.69 (d,  $J$  = 11.8 Hz, 1H), 4.61–4.57 (m, 2H), 4.54 (d,  $J$  = 12.0 Hz, 1H), 4.49 (d,  $J$  = 12.0 Hz, 1H), 3.81–3.77 (m, 1H), 3.73 (dd,  $J$  = 10.8, 4.7 Hz, 1H), 3.70–3.64 (m, 2H), 2.64–2.55 (m, 1H), 2.24 (ddd,  $J$  = 11.0, 8.5, 4.1 Hz, 2H), 1.96 (ddd,  $J$  = 13.1, 8.0, 2.8 Hz, 1H);  $^{13}\text{C}$  NMR (150 MHz, Acetone):  $\delta$  139.0, 138.8, 138.6 (2), 128.2 (2), 127.8 (2), 127.6 (2), 127.5, 127.4, 127.3 (2), 101.4, 100.5, 79.1,

77.3, 72.9, 72.8, 72.6, 71.5, 69.8, 69.1, 41.0, 34.5; ESI-HRMS:  $m/z$  calcd for  $C_{38}H_{38}NaO_6 [M+Na]^+$ : 589.2566; found: 589.2557.

**(2*R*, 3*aR*, 4*R*, 5*S*, 6*R*, 7*aR*)-4,5-bis(benzyloxy)-6-[(benzyloxy)methyl]-2-phenoxyhexahydro-furo[2,3-*b*]pyran (20)**

A suspension of glycosyl donor **1** (58.2 mg), and PhOH **19** (11.3 mg), containing activated 4 Å molecular sieves (50 mg) in dry  $CH_2Cl_2$  (2.0 mL) was stirred under argon at room temperature for 30 minutes. After cooling to  $-30\text{ }^\circ\text{C}$ , NIS (33 mg) was added. The reaction mixture was then warmed slowly to room temperature, stirred for 3 h, and then quenched by the addition of  $NaS_2O_3$ . The suspension was diluted with  $CH_2Cl_2$  (5.0 mL), and filtered through Celite. The filtrate was washed successively with  $H_2O$ , saturated NaCl solution and dried with  $Na_2SO_4$ . The crude product was purified by flash column chromatography (petroleum ether/ethyl acetate, 5:1→4:1) to afford major product **20** (37.6 mg, 68%).

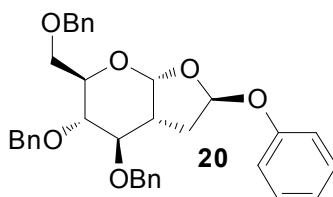

$[\alpha]_D^{20}$   $-17.1$  ( $c$  0.06, Acetone);  $^1H$  NMR (600 MHz, Acetone- $d_6$ ):  $\delta$  7.42–7.25 (m, 16H), 7.14 (d,  $J$  = 2.8 Hz, 1H), 7.04 (dd,  $J$  = 12.6, 8.3 Hz, 2H), 6.97 (t,  $J$  = 7.8 Hz, 1H), 5.96 (dd,  $J$  = 5.6, 2.9 Hz, 1H), 5.62 (dd,  $J$  = 5.2, 3.3 Hz, 1H), 4.83 (dd,  $J$  = 11.6, 3.1 Hz, 1H), 4.75 (ddd,  $J$  = 12.0, 8.6, 3.2 Hz, 2H), 4.64–4.53 (m, 3H), 3.88–3.84 (m, 1H), 3.78–3.73 (m, 2H), 3.72–3.67 (m, 2H), 2.48 (dt,  $J$  = 13.5, 5.8 Hz, 1H), 2.29 (s, 1H), 2.21 (ddd,  $J$  = 13.9, 7.9, 3.0 Hz, 1H).  $^{13}C$  NMR (150 MHz, Acetone):  $\delta$  139.0, 138.8, 138.6, 133.8, 129.8, 129.6, 129.3, 128.2 (2), 127.8, 127.7, 127.5 (2), 127.3, 121.6, 116.6, 101.1, 100.4, 78.9, 77.2, 72.9 (2), 72.8, 71.7, 69.7, 40.9, 34.6. ESI-HRMS:  $m/z$  calcd for  $C_{35}H_{36}NaO_6 [M+Na]^+$ : 575.2410; found: 575.2391.

**(2*R*, 3*aR*, 4*R*, 5*S*, 6*R*, 7*aR*)-4,5-bis(benzyloxy)-6-[(benzyloxy)methyl]-2-(4-nitrophenoxy)hexahydro-furo[2,3-*b*]pyran (22)**

A suspension of glycosyl donor **1** (58.2 mg), and *p*-NO<sub>2</sub>-PhOH **21** (16.7 mg), containing activated 4 Å molecular sieves (50 mg) in dry  $CH_2Cl_2$  (2.0 mL) was stirred under argon at room temperature for 30 minutes. After cooling to  $-30\text{ }^\circ\text{C}$ , NIS (33 mg) was added. The reaction mixture was then warmed slowly to room temperature, stirred for 3 h, and then quenched by the addition of  $NaS_2O_3$ . The suspension was diluted with  $CH_2Cl_2$  (5.0 mL), and filtered through Celite. The filtrate was washed successively with  $H_2O$ , saturated NaCl solution and dried with  $Na_2SO_4$ . The crude product was purified by flash column chromatography (petroleum ether/ethyl acetate, 5:1→4:1) to afford major product **22** (47.2 mg, 79%).

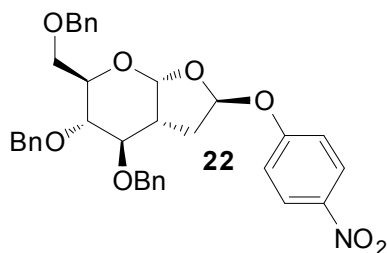

$[\alpha]_D^{20}$   $-8.3$  ( $c$  0.30, Acetone);  $^1\text{H}$  NMR (600 MHz, Acetone- $d_6$ ):  $\delta$  8.26–8.18 (m, 2H), 7.47–7.12 (m, 17H), 6.17 (dd,  $J$  = 5.5, 2.6 Hz, 1H), 5.66 (d,  $J$  = 5.5 Hz, 1H), 4.82 (d,  $J$  = 11.8 Hz, 1H), 4.75 (dd,  $J$  = 11.5, 9.3 Hz, 2H), 4.64–4.52 (m, 3H), 3.87 (ddd,  $J$  = 8.9, 4.7, 2.3 Hz, 1H), 3.80 (t,  $J$  = 5.7 Hz, 1H), 3.77–3.68 (m, 3H), 2.77 (d,  $J$  = 6.1 Hz, 1H), 2.56 (dt,  $J$  = 13.9, 6.0 Hz, 1H), 2.30 (ddd,  $J$  = 14.0, 8.1, 2.6 Hz, 1H);  $^{13}\text{C}$  NMR (150 MHz, Acetone):  $\delta$  162.4, 142.1, 138.9, 138.7, 138.5, 128.2 (3), 127.9, 127.8, 127.7, 127.6, 127.5, 127.4, 125.5, 116.6, 101.6, 100.6, 78.4, 76.9 (2), 72.8, 72.6, 71.7, 69.8, 40.4, 34.4; ESI-HRMS:  $m/z$  calcd for  $\text{C}_{35}\text{H}_{35}\text{NNaO}_8$   $[\text{M}+\text{Na}]^+$ : 620.2260; found: 620.2267.

**(2*R*, 3*aR*, 4*R*, 5*S*, 6*R*, 7*aR*)-4,5-bis(benzyloxy)-6-[(benzyloxy)methyl]-2-(2-chloro-4-nitrophenoxy)hexahydro-furo[2,3-*b*]pyran (24)**

A suspension of glycosyl donor **1** (58.2 mg), and 2-Cl-4-NO<sub>2</sub>-PhOH **23** (20.8 mg), containing activated 4 Å molecular sieves (50 mg) in dry CH<sub>2</sub>Cl<sub>2</sub> (2.0 mL) was stirred under argon at room temperature for 30 minutes. After cooling to  $-30$  °C, NIS (33 mg) was added. The reaction mixture was then warmed slowly to room temperature, stirred for 3 h, and then quenched by the addition of NaS<sub>2</sub>O<sub>3</sub>. The suspension was diluted with CH<sub>2</sub>Cl<sub>2</sub> (5.0 mL), and filtered through Celite. The filtrate was washed successively with H<sub>2</sub>O, saturated NaCl solution and dried with Na<sub>2</sub>SO<sub>4</sub>. The crude product was purified by flash column chromatography (petroleum ether/ethyl acetate, 5:1→4:1) to afford major product **24** (46.1 mg, 73%).

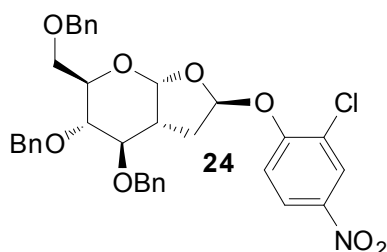

$[\alpha]_D^{20}$   $-5.9$  ( $c$  0.35, Acetone);  $^1\text{H}$  NMR (600 MHz, Acetone- $d_6$ ):  $\delta$  8.26 (d,  $J$  = 2.7 Hz, 1H), 8.21 (dd,  $J$  = 9.2, 2.8 Hz, 1H), 7.52 (d,  $J$  = 9.2 Hz, 1H), 7.42–7.23 (m, 15H), 6.24 (dd,  $J$  = 5.4, 2.3 Hz, 1H), 5.70 (d,  $J$  = 5.6 Hz, 1H), 4.81 (d,  $J$  = 11.7 Hz, 1H), 4.74 (dd,  $J$  = 11.3, 10.0 Hz, 2H), 4.60 (d,  $J$  = 11.4 Hz, 1H), 4.58–4.51 (m, 2H), 3.86 (ddd,  $J$  = 8.8, 4.7, 2.4 Hz, 1H), 3.82 (t,  $J$  = 5.5 Hz, 1H), 3.76–3.66 (m, 3H), 2.84 (dd,  $J$  = 13.6, 6.7 Hz, 1H), 2.65–2.57 (m, 1H), 2.39 (ddd,  $J$  = 14.0, 8.1, 2.4 Hz, 1H).  $^{13}\text{C}$  NMR (150 MHz, Acetone):  $\delta$  158.0, 142.0, 138.9, 138.7, 138.5, 128.3 (2), 128.2, 127.9, 127.8,



was washed successively with H<sub>2</sub>O, saturated NaCl solution and dried with Na<sub>2</sub>SO<sub>4</sub>. The crude product was purified by flash column chromatography (petroleum ether/ethyl acetate, 5:1→4:1) to afford major product **28** (57.5 mg, 85%).

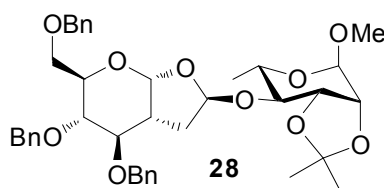

Colorless syrup;  $[\alpha]_D^{20} + 8.7$  (*c* 1.83, Acetone); <sup>1</sup>H NMR (600 MHz, CDCl<sub>3</sub>): δ 7.36–7.22 (m, 13H), 7.16 (d, *J* = 6.5 Hz, 2H), 5.63 (dd, *J* = 5.4, 2.3 Hz, 1H), 5.57 (d, *J* = 5.3 Hz, 1H), 4.84 (s, 1H), 4.76 (d, *J* = 11.8 Hz, 1H), 4.65–4.60 (m, 3H), 4.53 (d, *J* = 12.1 Hz, 1H), 4.47 (d, *J* = 11.1 Hz, 1H), 4.10 (t, *J* = 6.1 Hz, 1H), 4.07 (d, *J* = 5.7 Hz, 1H), 3.85–3.80 (m, 1H), 3.75–3.66 (m, 3H), 3.57–3.53 (m, 3H), 3.35 (s, 3H), 2.57–2.50 (m, 1H), 2.27–2.18 (m, 1H), 1.90 (ddd, *J* = 13.6, 7.9, 2.3 Hz, 1H), 1.54 (s, 3H), 1.34 (s, 3H), 1.24 (d, *J* = 5.6 Hz, 3H); <sup>13</sup>C NMR (150 MHz, CDCl<sub>3</sub>): δ 138.4, 138.1, 138.0, 128.5, 128.4, 128.3, 127.9, 127.8 (3), 127.7, 127.6, 109.3, 101.4, 100.5, 98.0, 79.4, 78.8, 77.7, 77.0, 76.0, 73.5, 73.4, 73.3, 71.5, 69.3, 64.3, 54.8, 41.1, 35.1, 28.0, 26.4, 17.5; ESI-HRMS: *m/z* calcd for C<sub>39</sub>H<sub>48</sub>NaO<sub>10</sub> [M+Na]<sup>+</sup>: 699.3145; found 699.3140.

**(2*R*, 3*aR*, 4*R*, 5*S*, 6*R*, 7*aR*)-2-azido-4,5-bis(benzyloxy)-6-[(benzyloxy)methyl]hexahydro-furo[2,3-*b*]pyran (30)**

A suspension of glycosyl donor **1** (58.2 mg), and TMSN<sub>3</sub> **29** (18.4 μL), containing activated 4 Å molecular sieves (50 mg) in dry CH<sub>2</sub>Cl<sub>2</sub> (2.0 mL) was stirred under argon at room temperature for 30 minutes. After cooling to –30 °C, NIS (33 mg) was added. The reaction mixture was then warmed slowly to room temperature, stirred for 2 h, and then quenched by the addition of NaS<sub>2</sub>O<sub>3</sub>. The suspension was diluted with CH<sub>2</sub>Cl<sub>2</sub> (5.0 mL), and filtered through Celite. The filtrate was washed successively with H<sub>2</sub>O, saturated NaCl solution and dried with Na<sub>2</sub>SO<sub>4</sub>. The crude product was purified by flash column chromatography (petroleum ether/ethyl acetate, 6:1) to afford major product **30** (39.1 mg, 78%).

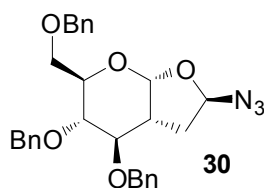

$[\alpha]_D^{20} + 12.0$  (*c* 0.27, Acetone); <sup>1</sup>H NMR (600 MHz, Acetone-*d*<sub>6</sub>): δ 7.31 (m, 15H), 5.72 (dd, *J* = 6.1, 3.5 Hz, 1H), 5.62 (d, *J* = 5.5 Hz, 1H), 4.78 (d, *J* = 11.8 Hz, 1H), 4.70 (t, *J* = 12.2 Hz, 2H), 4.59 (d, *J* = 3.3 Hz, 1H), 4.57 (d, *J* = 4.2 Hz, 1H), 4.53 (d, *J* = 12.0 Hz, 1H), 3.78 (ddd, *J* = 8.6, 4.5, 2.2 Hz, 1H), 3.74–3.65 (m, 4H), 2.65–2.58 (m,

1H), 2.35–2.27 (m, 1H), 1.86 (ddd,  $J = 13.6, 7.8, 3.5$  Hz, 1H).  $^{13}\text{C}$  NMR (150 MHz, Acetone):  $\delta$  138.9, 138.8, 138.5, 128.2 (3), 127.8 (2), 127.6, 127.5 (2), 127.3, 101.5, 90.4, 78.2, 76.9 (2), 72.9, 72.8, 72.6, 71.7, 69.7, 40.6, 34.0; ESI-HRMS:  $m/z$  calcd for  $\text{C}_{29}\text{H}_{31}\text{N}_3\text{NaO}_5$   $[\text{M}+\text{Na}]^+$ : 524.2161; found: 524.2156.

## 2.5 Allylation of 5 – Experimental Procedures and Spectral Data

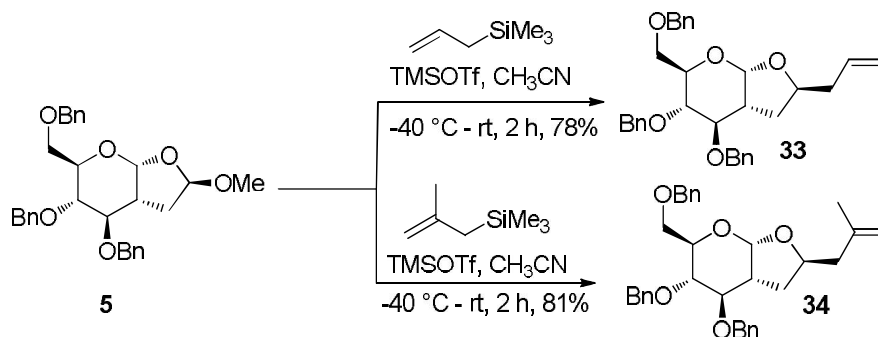

### (2*R*, 3*aR*, 4*R*, 5*S*, 6*R*, 7*aR*)-2-allyl-4,5-bis(benzyloxy)-6-[(benzyloxy)methyl]hexahydro-furo[2,3-*b*]pyran (33)

To a stirring solution of 5 (49.0 mg.) in anhydrous  $\text{CH}_3\text{CN}$  (1 mL) at  $-40\text{ }^\circ\text{C}$  and under  $\text{N}_2$  was added allyltrimethylsilane (32  $\mu\text{L}$ ). Then trimethylsilyl triflate (14.8  $\mu\text{L}$ ) was added dropwise. The reaction mixture was stirred at  $-40\text{ }^\circ\text{C}$  for 1.5 h, then for 0.5 h at room temperature. The yellow mixture was diluted with  $\text{CH}_2\text{Cl}_2$  (10 mL), and neutralised with saturated  $\text{NaHCO}_3$  solution ( $2 \times 10\text{ mL}$ ). The organic layer was collected, and the aqueous layer was reextracted with further  $\text{CH}_2\text{Cl}_2$  ( $2 \times 10\text{ mL}$ ). The combined organic phases were dried over anhydrous  $\text{Na}_2\text{SO}_4$  and concentrated. The crude material was slightly diluted with  $\text{CH}_2\text{Cl}_2$  (0.2 mL) and purified by silica gel flash column chromatography (petroleum ether/ethyl acetate, 8:1) to afford product 33 as a colorless syrup (39.2 mg, 78%).

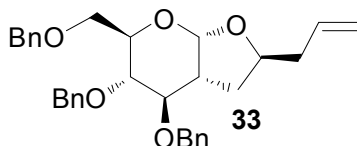

$[\alpha]_{\text{D}}^{20} + 70.6$  ( $c$  0.30,  $\text{CHCl}_3$ );  $^1\text{H}$  NMR (600 MHz,  $\text{CDCl}_3$ ):  $\delta$  7.38–7.19 (m, 15H), 5.80–5.67 (m, 1H), 5.45 (d,  $J = 4.5$  Hz, 1H), 5.12–5.01 (m, 2H), 4.88 (d,  $J = 11.5$  Hz, 1H), 4.78 (d,  $J = 10.9$  Hz, 1H), 4.70–4.66 (m, 1H), 4.65 (d,  $J = 9.7$  Hz, 1H), 4.63 (d,  $J = 8.5$  Hz, 1H), 4.55 (d,  $J = 12.1$  Hz, 1H), 4.15 (dq,  $J = 12.0, 6.1$  Hz, 1H), 3.82 (dd,  $J = 18.8, 7.9$  Hz, 2H), 3.74 (t,  $J = 8.9$  Hz, 1H), 3.70 (dd,  $J = 10.4, 1.4$  Hz, 1H), 3.54 (t,  $J = 8.6$  Hz, 1H), 2.32 (dt,  $J = 12.8, 6.4$  Hz, 2H), 2.21 (dt,  $J = 13.4, 6.5$  Hz, 1H), 1.88 (dd,  $J = 12.5, 5.8$  Hz, 1H), 1.71–1.64 (m, 1H);  $^{13}\text{C}$  NMR (150 MHz,  $\text{CDCl}_3$ ):  $\delta$  138.5, 138.3, 138.1, 133.9, 128.5, 128.4, 128.4, 128.1, 127.9, 127.8, 127.7, 127.6, 117.5, 101.5, 80.7, 77.9, 76.6, 74.6, 74.4, 73.6, 72.2, 68.8, 44.3, 40.7, 33.8. ESI-HRMS:  $m/z$

calcd for  $C_{32}H_{36}NaO_5$   $[M+Na]^+$ : 523.2460; found: 523.2455.

**(2*R*, 3*aR*, 4*R*, 5*S*, 6*R*, 7*aR*)-4,5-bis(benzyloxy)-6-[(benzyloxy)methyl]-2-(2-methylallyl)hexahydro-furo[2,3-*b*]pyran (**34**)**

To a stirring solution of **5** (49.0 mg,) in anhydrous  $CH_3CN$  (1 mL) at  $-40\text{ }^\circ\text{C}$  and under  $N_2$  was added 2-methylallyltrimethylsiane (35  $\mu\text{L}$ ). Then trimethylsilyl triflate (14.8  $\mu\text{L}$ ) was added dropwise. The reaction mixture was stir at  $-40\text{ }^\circ\text{C}$  for 1.5 h, then for 0.5 h at room temperature. The yellow mixture was diluted with  $CH_2Cl_2$  (10 mL), and neutralised with saturated  $NaHCO_3$  solution ( $2 \times 10\text{ mL}$ ). The organic layer was collected, and the aqueous layer was reextracted with further  $CH_2Cl_2$  ( $2 \times 10\text{ mL}$ ). The combined organic phases were dried over anhydrous  $Na_2SO_4$  and concentrated. The crude material was slightly diluted with  $CH_2Cl_2$  (0.2 mL) and purified by silica gel flash column chromatography (petroleum ether/ethyl acetate, 8:1) to afford product **34** as a colorless syrup (41.9 mg, 81%).

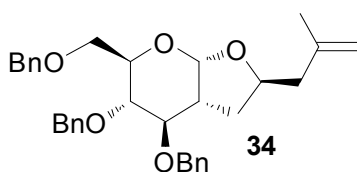

$[\alpha]_D^{20} + 74.6$  ( $c$  0.30,  $CHCl_3$ );  $^1H$  NMR (600 MHz,  $CDCl_3$ ):  $\delta$  7.37–7.20 (m, 15H), 5.46 (d,  $J = 4.6\text{ Hz}$ , 1H), 4.88 (d,  $J = 11.6\text{ Hz}$ , 1H), 4.79 (d,  $J = 11.2\text{ Hz}$ , 2H), 4.69 (d,  $J = 11.2\text{ Hz}$ , 2H), 4.65 (d,  $J = 8.9\text{ Hz}$ , 1H), 4.64 (d,  $J = 7.6\text{ Hz}$ , 1H), 4.54 (d,  $J = 12.1\text{ Hz}$ , 1H), 4.23 (dq,  $J = 12.6, 6.3\text{ Hz}$ , 1H), 3.82 (dd,  $J = 15.5, 6.4\text{ Hz}$ , 2H), 3.75 (t,  $J = 8.9\text{ Hz}$ , 1H), 3.70 (d,  $J = 8.8\text{ Hz}$ , 1H), 3.54 (t,  $J = 8.6\text{ Hz}$ , 1H), 2.33 (dd,  $J = 13.9, 6.5\text{ Hz}$ , 2H), 2.08 (dd,  $J = 14.0, 6.4\text{ Hz}$ , 1H), 1.88 (dd,  $J = 12.8, 5.9\text{ Hz}$ , 1H), 1.70 (s, 3H), 1.68–1.62 (m, 1H).  $^{13}C$  NMR (150 MHz,  $CDCl_3$ ):  $\delta$  142.0, 138.5, 138.3, 138.1, 128.4, 128.4, 128.4, 128.1, 127.9, 127.8, 127.7, 127.6, 112.6, 101.3, 80.6, 77.9, 75.8, 74.4, 74.4, 73.6, 72.2, 68.8, 44.8, 44.3, 34.4, 22.9; ESI-HRMS:  $m/z$  calcd for  $C_{33}H_{38}NaO_5$   $[M+Na]^+$ : 537.2617; found: 537.2621.
